# Supplementary material
Source: ML conference proceedings conference paper supplement (https://openreview.net/forum?id=eXubleMT0q)
Supplement: supplementary_material [file attachment]

---

# *Penguin*: Parallel-Packed Homomorphic Encryption for Fast Graph Convolutional Network Inference

---

Anonymous Author(s)

Affiliation

Address

email

## Abstract

1 The marriage of Graph Convolutional Network (GCN) and Homomorphic En-  
2 cryptation (HE) enables the inference of graph data on the cloud with significantly  
3 enhanced client data privacy. However, the tremendous computation and memory  
4 overhead associated with HE operations challenges the practicality of HE-based  
5 GCN inference. GCN inference involves a sequence of expensive matrix-matrix  
6 multiplications, and we observe that directly applying the state-of-the-art HE-based  
7 secure matrix-matrix multiplication solutions to accelerate HE-GCN inference is  
8 far less efficient as it does not exploit the unique aggregation mechanism of two-  
9 dimension graph node-features in GCN layer computation. As a result, in this paper,  
10 we propose a novel HE-based ciphertext packing technique, i.e., *Penguin*, that can  
11 take advantage of the unique computation pattern during the HE-GCN inference  
12 to significantly reduce the computation and memory overhead associated with HE  
13 operations. Specifically, *Penguin* employs (i) an effective two-dimension parallel  
14 packing technique for feature ciphertext with optimal graph node partitioning and  
15 graph feature interleaving, and (ii) an interleaved assembly technique that can  
16 effectively make use of blank slots to merge ciphertexts after feature reduction and  
17 thus significantly reduce costly rotation operations. We perform detailed theoretical  
18 analysis to support our arguments. In the meantime, our experimental results also  
19 show that *Penguin* can achieve up to  $\sim 10\times$  speedup and around  $\sim 79\%$  reduction  
20 in computational memory overhead, significantly outperforming state-of-the-art  
21 solutions. To the best of our knowledge, this is the first work that can ensure  
22 the protection of both graph structure and features when accelerating HE-GCN  
23 inference on encrypted data.

## 24 1 Introduction

25 Graph Convolution Neural Networks (GCNs) have recently demonstrated phenomenal performance  
26 for many privacy-sensitive applications such as social networks [33], cross-domain recommendation  
27 systems [34], and personal healthcare [17]. A popular solution for clients seeking to leverage these  
28 advanced GCN models is to utilize cloud-based inference services. However, clients often hesitate  
29 to share their graph data with the public cloud due to concerns about sensitive information, such as  
30 graph structure and node features that reveal personal social relationships and medical records. To  
31 address this privacy concern, one viable approach is to adopt the Homomorphic Encryption (HE)  
32 scheme [2, 5, 6]. By performing the entire inference computation on the cloud using encrypted data,  
33 the privacy of client data is significantly enhanced. This enables privacy-preserving GCN inferences  
34 while ensuring that sensitive information remains confidential.

35 While the idea of embedding HE into GCN inference on graph data seems appealing, it faces several  
36 significant challenges: **Firstly**, similar to HE-based CNN inference on non-graph data (such as for

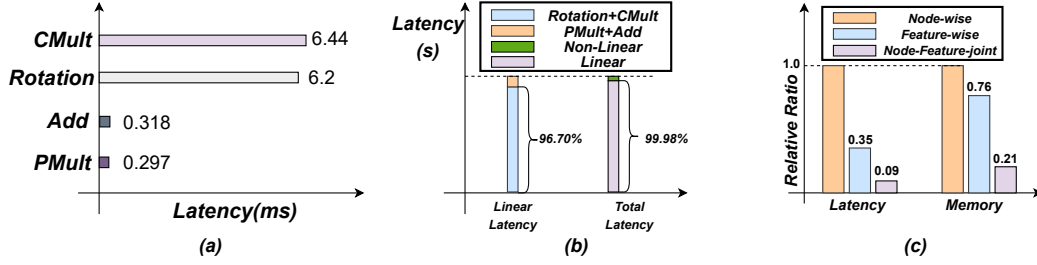

Figure 1: (a) Latency comparison of different HE operations under same encryption parameter and hardware environment; (b) Latency breakdown of linear/nonlinear HE operations in a typical GCN layer computation. (Detailed settings in Sec. 4.1). (c) Single optimization and wasted ciphertext slots have a negative effect on memory utilization and computation latency.

37 using convolutional neural networks (CNN) [9, 3, 7, 22, 1, 18, 25, 16, 13]), the enhanced privacy  
 38 would come at the cost of the tremendously escalated computational overhead associated with  
 39 HE operations (e.g., ciphertext (ct) rotations/multiplications, additions), which could be orders of  
 40 magnitude higher than the counterparts in the non-encrypted computation [9, 28, 15]. **Secondly**,  
 41 existing solutions focusing on alleviating computation overhead of HE-based CNN inference may  
 42 not be applicable or optimal to GCNs due to computing pattern differences between the CNN  
 43 and GCN [20]. For example, a GCN layer’s computation is dominated by the special consecutive  
 44 matrix multiplications ( $A \cdot X \cdot W$ ) for 2-dimensional feature-node aggregation–feature aggregation  
 45 via multiplying a high dimensional feature matrix  $X$  with weight matrix  $W$ , followed by graph  
 46 node aggregation with  $A$ , while a CNN layer’s computation is bottlenecked by multi-channel 2D  
 47 convolutions. **Thirdly**, simply treating the above critical matrix operations in HE-based GCN  
 48 inference as a traditional encrypted matrix-matrix multiplication (MM) problem for speedup is  
 49 sub-optimal because: 1) state-of-the-art (SOTA) HE-based MM acceleration often requires the matrix  
 50 to satisfy some special properties, e.g. square matrix with size  $64 \times 64$  [14], while GCN matrices  
 51 like feature matrix  $X$  are typically irregular depending on applications (i.e.  $2708 \times 1433$  in Cora  
 52 dataset [31]); 2) SOTA solutions focus on a one-time MM without considering the consecutive MMs  
 53 incurred by the two-dimensional feature-node aggregation, as well as the further processing of MMs’  
 54 result in the next GCN layer. This leads to inefficient ciphertext space utilization and unnecessary HE  
 55 operations, which further translates into prolonged HE-GCN inference, as we shall show in Sec. 4.2.

56 To better understand the computation cost of HE operations that dominate the HE-GCN inference  
 57 latency, we profile the latency of different HE operations using one GCN layer with 32 hidden units  
 58 and the Cora dataset with 2708 graph nodes and 1433 (32) input (output) features per node. All  
 59 HE operations are defined in Sec. 2. For generality, we assume *both feature matrix and adjacency*  
 60 *matrix are encrypted*, which is a typical case in inductive learning (e.g. dynamic graph structure in  
 61 link prediction) [21]. Without loss of generality, the same indexed features from different nodes are  
 62 packed as a ciphertext (feature-wise packing) and the encrypted matrices are diagonal-encoded for  
 63 MMs (detailed settings in Sec. 4.1). As Figure 1 (a) shows, first, the latency of ciphertext rotation  
 64 and ciphertext multiplication (CMult) can be much higher than other operations like plaintext (pt)  
 65 multiplication (PMult) or Addition, e.g.  $> 20 \times$  Rotation v.s. PMult. Furthermore, about  $> 99\%$   
 66 latency comes from the linear operations (mainly HE rotation and CMult due to the consecutive MMs),  
 67 instead of the nonlinear operations (ReLU replaced by a square function) due to feature reduction  
 68 in GCN (from 1433 input features to 32 output features). Meanwhile, for linear latency, Rotation  
 69 and CMult dominate the latency (e.g.  $> 96\%$  of total) as the size of the adjacency matrix could  
 70 be quite large (Cora:  $2708 \times 2708$ ) in the GCN problem. Last, we profile the latencies of different  
 71 ciphertext packing formats under the same evaluation setup as (b) in Figure 1 (c). From the profiling  
 72 result in Figure 1 (c), either the node-wise packing format (e.g. 1 ciphertext contains one node’s 1433  
 73 features) or the feature-wise packing format (e.g. 1 ciphertext contains the same indexed features  
 74 from 2707 nodes) could not effectively perform the HE-GCN inference. With node-feature-joint  
 75 packing format (e.g. 1 ciphertext packs 32 features and 128 nodes) by our proposed Two-Dimension  
 76 Parallel-Packing (see Sec. 3.2), the ciphertext size is fully exploited, and the total HE operation count  
 77 reaches a minimum, leading to significantly reduced latency and memory cost. These results indicate  
 78 that the key to accelerating the HE-based GCN inference is to significantly reduce the rotation and  
 79 CMult operations with a GCN-dedicated ciphertext packing format.

80 To this end, we propose *Penguin*, a novel HE ciphertext packing framework dedicated to accelerating  
81 GCN inference with the consideration of **encrypting both graph structure and features simul-**  
82 **taneously** (both adjacency matrix  $A$  and input feature matrix  $X$ ). The driving vision of *Penguin*  
83 is: *feature ciphertext packing ( $X$ ) for efficient HE-based GCN inference needs to be designed in a*  
84 *manner that is aware of the unique GCN computation—both the left-side graph node aggregation*  
85  *$AX$  and right-side feature aggregation ( $XW$ ), instead of optimization in one direction (either  $AX$*   
86 *or  $XW$ ). In this way, the whole ciphertext space can be efficiently utilized with minimized slot*  
87 *waste, enabling the significant reduction of ciphertext number (memory overhead) as well as the*  
88 *expensive HE rotation and CMult operations under the single instruction multiple data (SIMD)*  
89 *architecture. Our major contributions are three-fold: 1) We propose an efficient two-dimension*  
90 *parallel packing technique for ciphertext via optimal graph node partition and feature interleaving.*  
91 *By performing the feature-level aggregation first and formulating the HE computation overhead*  
92 *as a constrained optimization problem, we analytically obtain the best feature-node partition that*  
93 *can maximize the usage of ciphertext space and minimize the costly HE operations. Experimental*  
94 *results are well consistent with theoretical analysis. 2) We propose an interleaved assembling (IA)*  
95 *technique to efficiently merge ciphertexts with blank slots incurred by feature dimension reduction in*  
96 *the feature aggregation stage. This extra-level optimization further significantly reduces the number*  
97 *of ciphertexts and associated HE operations. 3) We comprehensively evaluate our proposed *Penguin**  
98 *for CKKS-based GCN inference using Cora-based graph node classification, Citeseer-based link*  
99 *prediction, and Pubmed-based link prediction. Results show that our method achieves by up to*  
100 *about  $10\times$  inference speedup and 79% memory overhead reduction, significantly outperforming the*  
101 *state-of-the-art solutions. To the best of our knowledge, this is the first work focusing on accelerating*  
102 *the HE-based private graph convolutional neural network inference on encrypted graph data, of*  
103 *which both the sensitive graph features and graph structure are protected.*

## 104 2 Preliminary

105 **CKKS Homomorphic Encryption Scheme.** Homomorphic Encryption (HE) allows computations  
106 on encrypted data. HE has different categories according to the different computation types they  
107 support. The Leveled HE (LHE) schemes support a limited number of additions or multiplications  
108 while Fully HE (FHE) allows an arbitrary number of computations using a bootstrapping procedure  
109 that can effectively refresh the ciphertext and obtain a new ciphertext that encrypts the same value  
110 but has lower noise [8]. In this work, we focus on reducing the number of bottlenecked operations in  
111 CKKS—one of the promising LHEs, without considering the costly bootstrapping.

112 CKKS [5] is an LHE scheme and its security is based on the hardness of ring learning with errors  
113 (RLWE) problem. CKKS allows arithmetic operations on encrypted data over fixed-point numbers  
114 with predefined precision, which makes it an ideal candidate for performing machine learning tasks  
115 where most of the computations are approximate. The supported homomorphic operations include  
116 ciphertext addition  $Add \sim (ct_1 + ct_2)$ , ciphertext multiplication  $CMult \sim (ct_1 \times ct_2)$ , plaintext  
117 multiplication  $PMult \sim (ct \times pt)$ , ciphertext  $Rotation \sim \rho(ct, k)$ . The rotation is to apply Galois  
118 automorphisms of the cyclotomic extension to the plaintext polynomials in encrypted form resulting  
119 in a cyclic shift of the slot vector. Among these four operations,  $Rotation$  and  $CMult$  are substantially  
120 slower ( $\sim 20\times$  slower) than ciphertext-plaintext addition and multiplication as shown in our runtime  
121 performance of CKKS in Figure 1 due to the expensive key-switching operation [22].

122 **Graph Convolution Neural Network.** To extract the hidden graph features  $H$ , the 2-dimensional  
123 feature-node aggregation of a typical GCN layer can be often abstracted as [20]:

$$H = \sigma(\tilde{D}_j^{-\frac{1}{2}} \tilde{A}_j \tilde{D}_j^{-\frac{1}{2}} XW) \quad (1)$$

124 Where  $X \in R^{N \times F}$  is the input feature matrix.  $W_j \in R^{F \times F'}$  represents weight parameters to  
125 transform the input features from an input dimension  $F$  to an output dimension  $F'$  (feature level  
126 aggregation).  $\tilde{D}_j$ ,  $\tilde{A}_j$  is the adjacency matrix with self-loop. The  $XW$  term is implemented by a  
127 fully-connected layer (node level aggregation) and then multiplied with the normalized adjacency  
128 matrix  $\tilde{D}_j^{-\frac{1}{2}} \tilde{A}_j \tilde{D}_j^{-\frac{1}{2}}$ . Finally, a non-linear activation function  $\sigma$  (e.g. ReLU) is applied to get one  
129 GCN layer’s output feature matrix  $H$ . Throughout this work, we refer  $A$  as the normalized adjacency  
130 matrix since normalization could be absorbed in a pre-processing step.

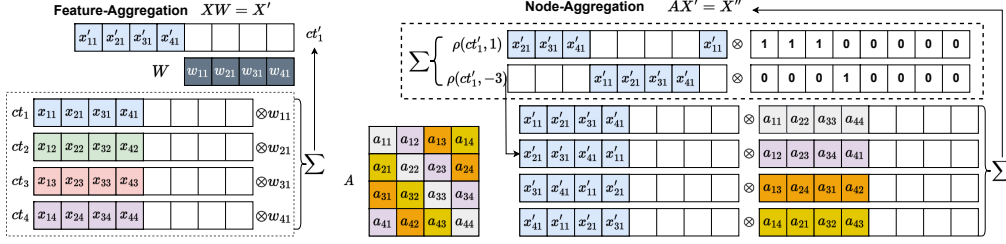

Figure 2: Feature-Optimized Packing Ciphertext Computation Flow.

131 **Threat Model.** We adopt a threat model setting consistent with prior works [9, 14, 3, 7, 18, 22, 27].  
 132 A client uploads private and sensitive data to the cloud for obtaining the online machine learning  
 133 model prediction results. The cloud server is semi-honest (e.g. honest but curious). To ensure data  
 134 privacy, the client encrypts their own data by HE and decrypts this inference result by their private  
 135 key. In this work, we focus on encrypting both graph node features  $X$  and the normalized adjacency  
 136 matrix  $A$ . The clients run the decoder of GAE [21] at their end because this step does not involve  
 137 trained model parameters on the cloud server.

### 138 3 Method

139 **Overview.** The GCN inference  $A \cdot X \cdot W$  can be separated into the two-dimension ( $A \cdot X$  on the  
 140 nodes and  $X \cdot W$  on the features) aggregation on feature matrix  $X$ . When we perform HE matrix  
 141 multiplication on the encrypted feature matrix (ciphertexts), it is inevitable that we need to perform  
 142 HE rotation on the same ciphertext. Unfortunately, the rotation operation not only incurs high latency  
 143 but also generates a huge number of ciphertext copies that consume a large amount of memory space.  
 144 In this section, we propose a holistic solution set to systematically address these issues.

145 In order to effectively reduce the number of ciphertexts involved in HE computation, our design is  
 146 built upon the feature-wise packing since multiplying  $W$  often leads to a lower feature dimension.  
 147 However, for non-densely packed ciphertexts, feature-wise packing is further subject to the data  
 148 alignment issue, resulting in extra rotations. To overcome this challenge, we propose the two-  
 149 dimension parallel-packing. In addition, considering that the layer-wise feature number reduction  
 150 would result in many wasted slots, we further propose the interleaved assembling to efficiently merge  
 151 such ciphertexts.

#### 152 3.1 Motivation of Feature-Oriented Ciphertext Packing

153 The major inference computation in GCN can be illustrated as  $A \cdot X \cdot W$ , where  $A \in R^{N \times N}$  is the  
 154 normalized adjacency matrix used for node-wise aggregation,  $X \in R^{N \times F}$  is the input feature matrix,  
 155 and  $W \in R^{F \times F'}$  is the weight matrix used for feature-wise aggregation. Apparently, we can choose  
 156  $A \cdot X$  or  $X \cdot W$  as the first step, which will not change the final product. However, considering  
 157 that matrix  $X$  is encrypted as ciphertexts, the order of computation will affect the efficiency since  
 158 the ciphertexts with fewer dimensions will reduce the required HE operations and copies of the  
 159 ciphertexts. For example, if  $F' < F$ , we first perform  $X \cdot W$  to produce an intermediate product with  
 160 fewer dimensions, i.e.,  $R^{N \times F'}$ . This will reduce the computational overhead and latency in the next  
 161 step  $A \cdot X$ . On the contrary, if  $F < F'$ , we first perform  $A \cdot X$ .

162 We explore two ciphertext packing design options that could lead to minimized computational  
 163 overhead of a single-dimension aggregation (either graph node or feature). One is the feature-wise  
 164 packing, where one ciphertext only packs one feature data from different nodes. The number of  
 165 ciphertexts is proportional to feature number. The other is the node-wise packing, where the number  
 166 of ciphertexts is equal to the number of graph nodes. However, in this case, the number of graph  
 167 nodes (or ciphertexts) does not change during inference, this inevitably results in too many wasted  
 168 empty slots in the ciphertexts and thus would yield more HE rotations. As the example in Figure 2  
 169 shows, we assume the ciphertext packing size is 8, adjacency matrix  $A \in R^{4 \times 4}$ , weight matrix  
 170  $W \in R^{4 \times 1}$ , and feature matrix  $X \in R^{4 \times 4}$ . The 4 feature-wise packing ciphertexts can be reduced to  
 171 1 ciphertext after feature aggregation, which only needs 4 ciphertext-multiplication (CMult) in the

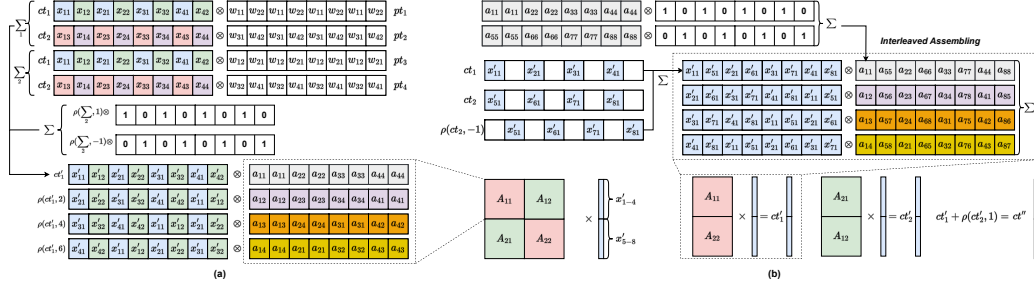

Figure 3: (a) The Two-Dimension Parallel-Packing. (b) The Interleaved Assembling.

172 next adjacency matrix multiplication. If using the node-wise packing, we still need 16 CMult in the  
 173 next step. Therefore, we choose feature-wise packing in our design.

### 174 3.2 Two-Dimension Parallel-Packing

175 **Optimization Problem Formulation** Following the definition in the previous section, we assume  
 176 that the ciphertext has  $M$  available slots for packing data and consider the following general case:  
 177  $M > N$  and  $M > F$ . As shown in Figure 2, after the feature-wise packing, the same features of  
 178 different data from feature matrix  $X$  are encoded into the same ciphertext  $X = [ct_1 \dots ct_F]$  and  
 179 then multiplied with weights  $w_{ij}$  to get matrix  $X' = XW = [ct'_1, \dots, ct'_{F'}]$  in the same feature-wise  
 180 packing format (see Eq.( 2)).

$$ct'_j = \sum_{i=1}^F ct_i \otimes w_{ij}, j \in F' \quad (2)$$

181 For node-wise aggregation, we need to perform diagonal-encoded matrix multiplication [11] on  
 182 ciphertexts  $F'$  individually. However, due to  $M > N$ , we need to generate the corresponding  
 183 ciphertext copies with each data aligned by rotating each ciphertext twice and scaling with the mask  
 184 vector then summing (see Eq.( 3)).

$$ct'_{ij} = \rho(ct'_j, i) \otimes ms_i + \rho(ct'_j, -(N - i)) \otimes ms_{-(N-i)}, i \geq 1 \quad (3)$$

185 After that, we multiply them with the corresponding diagonal-encoded vector  $d_i$  of adjacency matrix  
 186  $A$  and sum up them to get the node-wise aggregation result of  $A \cdot X'$  (see Eq.( 4)).

$$ct''_j = \sum_{i=0}^{N-1} (ct'_{ij}) \otimes d_i, ct'_{0j} = ct'_j \quad (4)$$

187 In this process, we can find that data alignment issue for non-densely packed ciphertexts leads to  
 188 extra rotations. We propose the two-dimension parallel-packing to solve it. Our idea is to leverage  
 189 the matrix partition to fully pack data in all slots and amortize the HE computation cost.

190 Figure 3(a) shows our basic idea. We partition  $n$  (a power two number) graph nodes into a small  
 191 block to fully utilize the size of the ciphertext and encode the feature matrix  $X$ . In each ciphertext,  
 192 we actually pack  $n$  nodes corresponding to  $f$  different features together in an interleaved way. For  
 193 feature-wise aggregation, we adopt the baby-step algorithm [18, 14] to get the different output features  
 194 with good alignment. As shown in Figure 3 (a), the number of rotations  $2(f - 1)$  used here for each  
 195 ciphertext depends on the number of different features  $f = M/n$  (we assume the output feature  
 196  $F' \geq f$ ). Then, we continue to rotate each ciphertext for  $n - 1$  times and perform the diagonal  
 197 encoded matrix multiplication [11] for  $A \cdot X$ . The total complexity of rotation is:

$$(n - 1) \cdot (N \cdot F'/M) + (2(f - 1)) \cdot (N/n \cdot (F'/f)) \quad (5)$$

198 Since  $M = n \cdot f$ , the total complexity is further equal to

$$(N \cdot F'/M) \cdot ((n - 1) + 2(f - 1)) \quad (6)$$

199 According to Cauchy-Schwarz inequality:

$$O(n + 2f) \geq O(2 \cdot \sqrt{2nf/2}) = O(2 \cdot \sqrt{M}) \quad (7)$$

200 Where  $n = 2f$ , the total complexity of rotation reaches a minimum. Hence minimizing the number  
 201 of rotations can be modeled as an optimization problem:

$$\operatorname{argmin}_{(f,n)} \{(n-1) + 2(f-1)\} s.t. \begin{cases} M = n * f \\ f = 2^k, k \in N^+ \\ M > N, M > F \end{cases} \quad (8)$$

202 **Supporting Large Graph** Eq. 8 assumes that the number of graph nodes should be smaller than  
 203 that of ciphertext slots ( $M > N$ ), however, for scaled graph networks, it is possible that  $M \leq N$ .  
 204 For example, the PubMed [31] contains 19717 nodes, which is far more than the 4096 ciphertext  
 205 slots. To address this, our method can be scalable to such cases by splitting a large graph into several  
 206 sub-graphs. Assuming we use feature-wise encoding and it requires 5 cts (each with 4096 slots) to  
 207 pack 1 feature. Accordingly, each feature will have 4 cts with fully packed 4096 nodes and 1 ct with  
 208 partially packed 3333 nodes. To solve the problem under the constraint  $M \leq N$ , we split  $N$  as:

$$N = x \cdot M + R \quad (9)$$

209 where  $x = N \operatorname{mod} M$ ,  $R = N \% M$ . Eq. 9 leads to one  $R \times F$  sub-block matrix and  $x$  of  $M \times F$  sub-  
 210 block matrices. For the  $R \times F$  matrix, we refer to Eq. 7 to optimize the *Rotation* as  $N = R < M$ .  
 211 For other  $M \times F$  sub-block matrices with  $N = M$ , we change the assumption from  $N < M$  to  
 212  $N = M$ . Then, again with our proposed Two-Dimension Parallel-Packed ct, the total complexity of  
 213 rotations becomes:

$$(M \cdot F' / M) \cdot ((n-1) + 2(f-1)) = F' \cdot (n + 2f - 3) \quad (10)$$

214 The corner case  $f = 1$  is different from that in the discussion of optimization problem formulation.  
 215 Because ct here is fully packed for  $n = M$  and does not have the data alignment issue. For  
 216  $n = M$ ,  $F' = 1$ , the total complexity of *Rotation* becomes:

$$F' \cdot (M - 1) \quad (11)$$

217 Except for this corner case  $n = M$ ,  $f = 1$ , the total complexity reaches a minimum when  $n = 2f$ .  
 218 We compare the previously proved minimum with the corner case  $n = M$ ,  $f = 1$  here, and get the  
 219 difference of rotations complexity as follows:

$$F' \cdot ((M - 1) - (2\sqrt{M} - 3)) = F' \cdot (M - 2\sqrt{M} - 4) = F' \cdot (\sqrt{M} - 2)^2 > 0 \quad (12)$$

220 In general, since  $M$  is set as  $\geq 2^{11}$  to guarantee security level [16, 27], the above inequality 12  
 221 always holds. Thus, when considering a  $M \times F$  matrix, the proposed Two-Dimension Parallel-Packing  
 222 can still reach the minimum at  $n = 2f$ .

### 223 3.3 Interleaved Assembling

224 In GCN inference, the reduction in feature size may result in wasted slots in two-dimension parallel-  
 225 packing. As the example shown in Figure 3(b), we optimally encode 32 different features into one  
 226 ciphertext at the beginning. After the feature extraction layer with 16 hidden units, the previous dense  
 227 encoded ciphertext will have half of the slots turn to blank. These blank slots in ciphertext bring  
 228 higher memory overhead, especially given that the adjacency matrix  $A$  is also encrypted, resulting in  
 229 more CMult operations thus computational overhead. We propose interleaved assembling to solve  
 230 this issue. Figure 3(b) shows our idea. We rotate the  $ct_2$  that contains node 5-8's features by 1 slot  
 231 and then add it with  $ct_1$  that contains node 1-4's features. After that, we have a new ciphertext  $ct'$  that  
 232 contains 8 nodes with 1 feature. Meanwhile, we multiply the two mask vectors with the ciphertexts  
 233 for sub-square matrix  $A_{11}$  (for node 1-4) and  $A_{22}$  (for node 5-8) and get an interleaved assembled  
 234 ciphertext contains matrix  $A_{11}$  and  $A_{22}$ . Then, by rotating ciphertext  $ct'$  3 times and performing  
 235 element-wise multiplication with new diagonal-encoded ciphertexts of the matrix  $A_{11}$  and  $A_{22}$ , we  
 236 could get the results—ciphertext  $ct'_1$  of node 1-4 with the matrix  $A_{11}$  and node 5-8 with the matrix  $A_{22}$   
 237 simultaneously. In this way, the complexity of HE operations including both rotation and ciphertext  
 238 multiplication can be reduced by half. After that, we repeat the steps to perform multiplication on  $ct'$   
 239 and ciphertext that contains  $A_{21}$  and  $A_{12}$  to get the  $ct'_2$ . Based on the formula  $ct'' = ct'_1 + \rho(ct'_2, 1)$ ,  
 240 we get the final result ciphertext  $ct''$  that multiples matrix  $(A_{11}, A_{12}, A_{21}, A_{22})$ . By leveraging such  
 241 an interleaved assembling, we could achieve  $\frac{f'}{f}$  times reduction of the total computational complexity,  
 242 where  $f'$  is the number of features on the current ciphertext, and  $f$  is the number of features on the  
 243 ciphertext before feature reduction.

## 244 4 Evaluation

### 245 4.1 Experiment Setup

246 **Datasets.** We adopt the Cora [31], Citeseer [10] and Pubmed [31] scientific publication datasets for  
247 graph learning. The Cora, Citeseer, and Pubmed contain 2708, 3327, and 19717 publication nodes  
248 divided into 7, 6, and 3 classes respectively. And each node consists of 1433, 3703, and 500 unique  
249 word features, respectively. To test the link prediction task [21], 90% of edges are removed and all  
250 node features are retained on all datasets.

251 **Models.** We train 3 Graph Auto-Encoder (GAE) models with 2 hidden layers and 2 activation  
252 layers on 3 different datasets, i.e., Cora, Citeseer, and Pubmed. The three models follow the same  
253 GAE architecture in [21], and are implemented using the DGL library [32]. Table 1 lists the model  
254 architecture and pertinent encryption parameters for encrypting both adjacency matrix  $A$  and feature  
255 matrix  $X$ . We use  $x^2$  as the non-linear function [9] to replace the ReLU activation and apply the  
256 ADAM optimizer to train the model for 200 epochs using a learning rate of 0.01. The accuracy of  
257 each model (AUC in Link Prediction) is maintained at the original level.

258 **Encryption parameters.** For all tasks, we apply a scaling factor  $\Delta = 2^{30}$  to ensure the accuracy of  
259 the encrypted inference using CKKS. Each rescale consumes 30 bits of ciphertext modulus  $Q$ , and  
260 there are 6 times rescale and corresponding 6 levels across the whole network. Thus, we set  $Q = 218$ ,  
261 and the polynomial degree  $N = 2^{13}$  to guarantee a 128-bit security level. Additionally, the scale  
262 factor of mask plaintext used in comparison with E2DM [14] & uSCORE [12] is set to  $2^{15}$ .

263 **Baseline designs.** To better evaluate the proposed approach, we develop several baselines, including:

- 264 • Penguin-family. We implement several Penguin baselines by applying only our proposed two-  
265 dimension parallel-packing technique (see Sec. 3.2). We set up different pairs of features and  
266 nodes when optimizing the packing format. Table 2 lists the numbers of features/nodes selected.  
267 Here  $Penguin(f, n)$  denotes that  $f$  features and  $n$  nodes are used in the corresponding baseline  
268 design. Note that, the baseline designs with  $f = 1$  or  $n = 1$  are the extreme cases when only the  
269 feature-wise or node-wise packing method is used.
- 270 • Penguin+IA. We develop two Penguin+IA baselines by further applying the proposed Interleaved  
271 Assembling (IA) technique (see Sec. 3.3) to the Penguin-family.
- 272 • We also implement the approaches using E2DM [14] and uSCORE [12] to represent the state-of-  
273 the-art secure matrix multiplication solutions.

274 **Measurements.** We use inference latency as our main performance metric, which is averaged over  
275 20 simulations. Besides, we record the Homomorphic Operation Count (HOC), including the number  
276 of rotations (*Rotation*), the number of ciphertext multiplications (*CMult*), etc. We also calibrate  
277 the numbers of ciphertexts and memory usage. A lower number of these metrics indicates better  
278 performance.

279 **Environment.** We conduct all experiments on a machine equipped with Threadripper 3975WX CPU  
280 using the single thread setting to test the inference latency and train these GAE models with 2 Nvidia  
281 3090 GPUs. We use Microsoft SEAL version 3.7.2 [30] to implement the RNS-variant of CKKS [4]  
282 scheme.

### 283 4.2 Evaluation Results

#### 284 4.2.1 Two-Dimension Parallel-Packing

285 Table 2 presents our evaluation results of the proposed two-dimension parallel-packing and interleaved  
286 assembling approach. We find that the packing format  $Penguin(f, n = 1)$  performs the worst on

Table 1: Model and encryption parameters.

| Dataset  | # Layers |         |            | Accuracy (AUC) | Encryption Parameters |     |    | Mult Level | Security Level |
|----------|----------|---------|------------|----------------|-----------------------|-----|----|------------|----------------|
|          | Hidden1  | Hidden2 | Activation |                | N                     | Q   | P  |            |                |
| Cora     | 32       | 16      | $x^2$      | 0.974          | 8192                  | 218 | 30 | 6          | 128-bit        |
| Citeseer |          |         |            | 0.747          |                       |     |    |            |                |
| PubMed   |          |         |            | 0.858          |                       |     |    |            |                |

Table 2: Ablation study of Two-Dimension Parallel-Packing and Interleaved Assembling.

| Dataset  | Packing-Format            | Rot         | HOC<br>CMult | Others | # of Ciphertexts  | Memory (GB) | Latency (s)     | Speedup ( $\times$ ) |
|----------|---------------------------|-------------|--------------|--------|-------------------|-------------|-----------------|----------------------|
| Cora     | Penguin(1433,1)           | 1048K       | 74K          | 282K   | 2708-2708-2708    | 2.38        | 7018.51         | -                    |
|          | Penguin(1, 2708)          | 260K        | 130K         | 223K   | 1433-32-16        | 1.82        | 2475.78         | 2.83                 |
|          | Penguin(16,256)           | 9.7K        | 9.3K         | 157K   | 990-22-11         | 0.49        | 678.03          | 10.35                |
|          | <b>Penguin(32,128)</b>    | <b>8.3K</b> | 124K         | 188K   | 990-22-22         | 0.65        | 871.15          | 8.06                 |
|          | Penguin(64,64)            | 13.5k       | 237k         | 365K   | 990-43-43         | 1.25        | 1650.28         | 4.25                 |
|          | <b>Penguin(32,128)+IA</b> | <b>6.9K</b> | 9.3K         | 157K   | 990-22-11         | 0.49        | <b>660.67</b>   | <b>10.62</b>         |
|          | Penguin(64,64)+IA         | 10.3K       | 9.3K         | 220k   | 989-22-11         | 0.49        | 693.13          | 10.13                |
| Citeseer | Penguin(3703,1)           | 1521K       | 1110K        | 3852K  | 3327-3327-3327    | 2.92        | 9240.10         | -                    |
|          | Penguin(1, 3327)          | 319K        | 160K         | 385K   | 3703-32-16        | 3.08        | 3064.91         | 3.01                 |
|          | Penguin(16,256)           | 110K        | 130K         | 324K   | 3016-26-13        | 1.40        | 950.30          | 9.72                 |
|          | <b>Penguin(32,128)</b>    | <b>9.8K</b> | 173K         | 367K   | 3016-26-26        | 1.62        | 1225.05         | 7.54                 |
|          | Penguin(64,64)            | 16.3K       | 346K         | 734K   | 3016-52-52        | 2.51        | 2429.47         | 3.80                 |
|          | <b>Penguin(32,128)+IA</b> | <b>7.4K</b> | 130K         | 324K   | 3016-26-13        | 1.39        | <b>928.10</b>   | <b>9.96</b>          |
|          | Penguin(64,64)+IA         | 12K         | 130K         | 387K   | 3016-26-13        | 1.39        | 982.08          | 9.41                 |
| PubMed   | Penguin(19717,1)          | 5974K       | 817K         | 12687K | 19717-19717-19717 | 9.75        | 44586.03        | -                    |
|          | Penguin(1, 500)           | 1106K       | 4732K        | 4897K  | 2500-160-80       | 17.3        | 37727.58        | 1.18                 |
|          | Penguin(16,256)           | 69K         | 4673K        | 4837K  | 2496-156-78       | 3.76        | 30906.28663     | 1.44                 |
|          | <b>Penguin(32,128)</b>    | <b>59K</b>  | 6151K        | 6314K  | 2480-155-155      | 11.6        | 40474.11        | 1.10                 |
|          | Penguin(64,64)            | 117K        | 12222K       | 12547K | 2472-309-309      | 42.9        | 80424.70        | 0.55                 |
|          | <b>Penguin(32,128)+IA</b> | <b>49K</b>  | 4633K        | 4794K  | 2480-155-78       | 3.76        | <b>30522.43</b> | <b>1.46</b>          |
|          | Penguin(64,64)+IA         | 73K         | 4633K        | 4954K  | 2472-155-78       | 3.75        | 30701.59        | 1.45                 |

287 the three datasets due to having the largest number of HOCs and no slot packing optimization. This  
 288 results in significant latency and memory overhead. In particular, since PubMed contains more  
 289 encrypted features (number of cts), the same design performs worse on PubMed than on the other two  
 290 datasets. We use this  $Penguin(f, n = 1)$  as the baseline to compare the speed of other approaches.

291 Our results clearly show that our proposed two-dimension parallel-packing method can significantly  
 292 reduce the HOCs (especially the number of rotations) and the number of ciphertexts. For example,  
 293 on the Cora dataset, our  $Penguin(16, 256)$ ,  $Penguin(32, 128)$ , and  $Penguin(64, 64)$  designs can  
 294 reduce the number of rotations from 1048K to 9.7K, 8.3K, and 13.5K, respectively, thus reducing  
 295 memory usage by  $\sim 79\%$ ,  $\sim 76\%$ , and  $\sim 47\%$ , and reaching  $\sim 10.35\times$ ,  $\sim 8.06\times$ , and  $\sim 4.25\times$   
 296 speed up, respectively.

297 In particular, the results we observed are well consistent with the theoretical analysis. For example,  
 298 with  $M = f * n = 4096, n = 2f$ , we have the theoretical minimum  $f_{min} = \sqrt{2048} \simeq 45$  (see  
 299 Section 3.2). We can observe that the baseline  $Penguin(32, 128)$  with  $f = 32, n = 128$  is very close  
 300 to the theoretical minimum and achieves the best results among the three designs. Meanwhile, other  
 301 HOCs besides Rotation may increase under the optimal packing and affect the overall latency. For  
 302 example,  $Penguin(32, 128)$  yields more ciphertext multiplication (CMult) than  $Penguin(16, 256)$   
 303 due to wasted slots from feature reduction, which can be further optimized using the proposed  
 304 Interleaved Assembling method.

305 Moreover, as we discussed for the large graph (see Section 3.2), all designs perform much worse in  
 306 PubMed than the other two datasets. This is because the number of nodes in PubMed is significantly  
 307 larger than the size of ciphertext ( $19717 \gg 4096$ ), which means that it needs to be multiplied with a  
 308 large  $19717 \times 19717$  adjacency matrix. Therefore, the number of CMult  $\gg$  number of Rot. However,  
 309 our proposed packing technique can still improve the performance in such cases.

#### 310 4.2.2 Interleaved Assembling

311 Table 2 also reports the evaluation results of incorporating the two-dimensional parallel packing  
 312 and interleaved assembly methods. For example, in Cora, the number of rotations, the number of  
 313 CMult, and the number of other HOCs in the  $Penguin(32, 128) + IA$  design are further reduced  
 314 by 1.4K, 114.7K, and 31K, respectively, compared to the parallel-packing only  $Penguin(32, 128)$ .  
 315 This makes  $Penguin(32, 128) + IA$  the best design on all datasets, i.e., with the minimum memory  
 316 usage of 0.49GB, 1.39GB, and 3.76GB and a  $10.62\times$ ,  $9.96\times$ , and  $1.46\times$  speedup on dataset Cora,  
 317 Citeseer, and PubMed, respectively. These results illustrate that our proposed interleaved assembly  
 318 can effectively reduce the wasted empty slots and save the number of ciphertexts selected in the  
 319 computation, thus significantly improving the efficiency based on the SIMD.



Table 3: Compare with the state-of-the-art.

| Dataset  | Method                    | Security Level | Latency (s)     | Amortized Latency | Speedup ( $\times$ ) |
|----------|---------------------------|----------------|-----------------|-------------------|----------------------|
| Cora     | E2DM(64) [14]             | 98-bit         | 3150.74         | 1.16              | -                    |
|          | uSCORE(32,128) [12]       | 98-bit         | 1727.12         | 0.64              | 1.82                 |
|          | <b>Penguin(32,128)+IA</b> | 128-bit        | <b>660.57</b>   | <b>0.24</b>       | <b>4.77</b>          |
| Citeseer | E2DM(64) [14]             | 98-bit         | 4561.15         | 1.37              | -                    |
|          | uSCORE(32,128) [12]       | 98-bit         | 2377.50         | 0.72              | 1.92                 |
|          | <b>Penguin(32,128)+IA</b> | 128-bit        | <b>928.10</b>   | <b>0.28</b>       | <b>4.91</b>          |
| Pubmed   | E2DM(64) [14]             | 98-bit         | 154530.49       | 7.84              | -                    |
|          | uSCORE(32,128) [12]       | 98-bit         | 78843.49        | 4.00              | 1.96                 |
|          | <b>Penguin(32,128)+IA</b> | 128-bit        | <b>30522.43</b> | <b>1.55</b>       | <b>5.06</b>          |

### 320 4.2.3 Compare with SOTA Solutions

321 In our evaluation, we also compare our best design *Penguin*(32, 128) + *IA* with the state-of-the-art  
322 (SOTA) solutions, including E2DM [14] and uSCORE [12]. Both SOTA solutions can speed up  
323 HE-GCN inference using the optimized matrix-matrix multiplication. Table 3 reports the results. Our  
324 encryption parameters can guarantee a 128-bit security level, which is higher than SOTA solutions  
325 that need more multiplicative levels to mask the plaintexts. To provide a fair comparison, we measure  
326 amortized latency, which is the latency required for link predictions of one node. As listed in Table 3,  
327 our method achieves an amortized latency of 0.24s on the Cora, which is  $4.77\times$  (or  $1.82\times$ ) faster  
328 than that of E2DM (or uSCORE). We observe a similar improvement on the Citeseer and PubMed.  
329 These results illustrate that by leveraging the unique features of GCN computation to reduce the  
330 number of ciphertexts and HOCs, our method significantly outperforms the SOTA methods that are  
331 based on the optimization of the general matrix-matrix multiplication in encryption domain.

## 332 5 Related Work

333 CryptoNets [9] is the first work that demonstrates the feasibility of building privacy-preserving  
334 machine learning (PPML) by HE. However, the long inference latency and the inflexible packing  
335 format make it hard to be applied to large-scale models and datasets. Another following work named  
336 SHE [24], translates the nonlinear ReLU and Max Pooling operations as Boolean operations to  
337 support the TFHE-based [6] PPML without modifying the pretrained models. There also exist many  
338 multi-party computation (MPC) solutions that combine the two-party computation protocols [35]  
339 with HE frameworks to achieve the low inference latency [29, 16, 25, 13, 23, 26]. However, they  
340 suffer from high communication overhead incurred by data transfer between multiple parties. Recent  
341 studies such as LoLa [3], CHET [7], and HEAR [19] leverage the ciphertext packing technique to  
342 place multiple data in the same ciphertext so that HE operations can be conducted efficiently via  
343 single instruction multiple data (SIMD) for accelerating HE-based CNN inference. These approaches  
344 are often not applicable or optimal to GCN inference due to the very different computation patterns  
345 between the GCN and CNN. CryptoGCN [27] is the first attempt to build HE-based PPML for  
346 GCNs. It packs the ciphertexts from individual node to relieve the adjacency matrix multiplication  
347 overhead. However, they assume the adjacency matrix as plaintext, which is not applicable to  
348 dynamic graph settings which require protecting both graph structure and features like our work.  
349 E2DM [14] and uSCORE [12] consider the two encrypted matrix-matrix multiplication optimization  
350 by decomposing the problem into small square matrix multiplication and supporting the consecutive  
351 matrix multiplication. However, these general solutions demonstrate limited efficiency to accelerate  
352 HE-based GCN inference, as shown in Sec. 4.2.

## 353 6 Conclusion

354 In this paper, we propose a two-dimension parallel packing technique for feature ciphertext by  
355 optimizing the feature matrix partition size and further propose an interleaved assembling technique  
356 to merge ciphertexts that have wasted slots from feature reduction in CKKS-based secure GCN  
357 inference. These techniques can better save ciphertext memory and effectively reduce the number  
358 of homomorphic operations required. Experimental results based on the GAEs for link prediction  
359 and 3 popular graph datasets show that our solution can speed up the latency of the secure GCN  
360 inference by  $10\times$  and reduce the memory requirement by more than 79%, greatly outperforming the  
361 state-of-the-art solutions.

## References

- 362
- 363 [1] Fabian Boemer, Anamaria Costache, Rosario Cammarota, and Casimir Wierzynski. ngraph-he2:  
364 A high-throughput framework for neural network inference on encrypted data. In *Proceedings*  
365 *of the 7th ACM Workshop on Encrypted Computing & Applied Homomorphic Cryptography*,  
366 pages 45–56, 2019.
- 367 [2] Zvika Brakerski, Craig Gentry, and Vinod Vaikuntanathan. (leveled) fully homomorphic  
368 encryption without bootstrapping. *ACM Transactions on Computation Theory (TOCT)*, 6(3):1–  
369 36, 2014.
- 370 [3] Alon Brutzkus, Ran Gilad-Bachrach, and Oren Elisha. Low latency privacy preserving inference.  
371 In *International Conference on Machine Learning*, pages 812–821. PMLR, 2019.
- 372 [4] Jung Hee Cheon, Kyoohyung Han, Andrey Kim, Miran Kim, and Yongsoo Song. A full rns  
373 variant of approximate homomorphic encryption. In *International Conference on Selected Areas*  
374 *in Cryptography*, pages 347–368. Springer, 2018.
- 375 [5] Jung Hee Cheon, Andrey Kim, Miran Kim, and Yongsoo Song. Homomorphic encryption for  
376 arithmetic of approximate numbers. In *International Conference on the Theory and Application*  
377 *of Cryptology and Information Security*, pages 409–437. Springer, 2017.
- 378 [6] Ilaria Chillotti, Nicolas Gama, Mariya Georgieva, and Malika Izabachène. Tfhe: fast fully  
379 homomorphic encryption over the torus. *Journal of Cryptology*, 33(1):34–91, 2020.
- 380 [7] Roshan Dathathri, Olli Saarikivi, Hao Chen, Kim Laine, Kristin Lauter, Saeed Maleki, Madanlal  
381 Musuvathi, and Todd Mytkowicz. Chet: an optimizing compiler for fully-homomorphic neural-  
382 network inferencing. In *Proceedings of the 40th ACM SIGPLAN Conference on Programming*  
383 *Language Design and Implementation*, pages 142–156, 2019.
- 384 [8] Craig Gentry. *A fully homomorphic encryption scheme*. Stanford university, 2009.
- 385 [9] Ran Gilad-Bachrach, Nathan Dowlin, Kim Laine, Kristin Lauter, Michael Naehrig, and John  
386 Wernsing. Cryptonets: Applying neural networks to encrypted data with high throughput and  
387 accuracy. In *International conference on machine learning*, pages 201–210. PMLR, 2016.
- 388 [10] C Lee Giles, Kurt D Bollacker, and Steve Lawrence. Citeseer: An automatic citation indexing  
389 system. In *Proceedings of the third ACM conference on Digital libraries*, pages 89–98, 1998.
- 390 [11] Shai Halevi and Victor Shoup. Algorithms in helib. In *Annual Cryptology Conference*, pages  
391 554–571. Springer, 2014.
- 392 [12] Zhicong Huang, Cheng Hong, Wen-jie Lu, Chenkai Weng, and Hunter Qu. More efficient  
393 secure matrix multiplication for unbalanced recommender systems. *IEEE Transactions on*  
394 *Dependable and Secure Computing*, 2021.
- 395 [13] Zhicong Huang, Wen-jie Lu, Cheng Hong, and Jiansheng Ding. Cheetah: Lean and fast secure  
396 two-party deep neural network inference. *IACR Cryptol. ePrint Arch.*, 2022:207, 2022.
- 397 [14] Xiaoqian Jiang, Miran Kim, Kristin Lauter, and Yongsoo Song. Secure outsourced matrix  
398 computation and application to neural networks. In *Proceedings of the 2018 ACM SIGSAC*  
399 *conference on computer and communications security*, pages 1209–1222, 2018.
- 400 [15] Wonkyung Jung, Eojin Lee, Sangpyo Kim, Jongmin Kim, Namhoon Kim, Keewoo Lee,  
401 Chohong Min, Jung Hee Cheon, and Jung Ho Ahn. Accelerating fully homomorphic en-  
402 cryption through architecture-centric analysis and optimization. *IEEE Access*, 9:98772–98789,  
403 2021.
- 404 [16] Chiraag Juvekar, Vinod Vaikuntanathan, and Anantha Chandrakasan. {GAZELLE}: A low  
405 latency framework for secure neural network inference. In *27th USENIX Security Symposium*  
406 *(USENIX Security 18)*, pages 1651–1669, 2018.
- 407 [17] Oussema Keskes and Rita Noumeir. Vision-based fall detection using st-gcn. *IEEE Access*,  
408 9:28224–28236, 2021.

- 409 [18] Miran Kim, Xiaoqian Jiang, Kristin Lauter, Elkhan Ismayilzada, and Shayan Shams. Hear:  
410 Human action recognition via neural networks on homomorphically encrypted data. *preprint*  
411 *arXiv:2104.09164*, 2021.
- 412 [19] Miran Kim, Xiaoqian Jiang, Kristin Lauter, Elkhan Ismayilzada, and Shayan Shams. Secure  
413 human action recognition by encrypted neural network inference. *Nature communications*,  
414 13(1):1–13, 2022.
- 415 [20] Thomas N Kipf and Max Welling. Semi-supervised classification with graph convolutional  
416 networks. *arXiv preprint arXiv:1609.02907*, 2016.
- 417 [21] Thomas N Kipf and Max Welling. Variational graph auto-encoders. *arXiv preprint*  
418 *arXiv:1611.07308*, 2016.
- 419 [22] Eunsang Lee, Joon-Woo Lee, Junghyun Lee, Young-Sik Kim, Yongjune Kim, Jong-Seon No,  
420 and Woosuk Choi. Low-complexity deep convolutional neural networks on fully homomorphic  
421 encryption using multiplexed parallel convolutions. In *International Conference on Machine*  
422 *Learning*, pages 12403–12422. PMLR, 2022.
- 423 [23] Jian Liu, Mika Juuti, Yao Lu, and Nadarajah Asokan. Oblivious neural network predictions via  
424 minionn transformations. In *Proceedings of the 2017 ACM SIGSAC conference on computer*  
425 *and communications security*, pages 619–631, 2017.
- 426 [24] Qian Lou and Lei Jiang. She: A fast and accurate deep neural network for encrypted data.  
427 *Advances in Neural Information Processing Systems*, 32, 2019.
- 428 [25] Pratyush Mishra, Ryan Lehmkuhl, Akshayaram Srinivasan, Wenting Zheng, and Raluca Ada  
429 Popa. Delphi: A cryptographic inference service for neural networks. In *29th USENIX Security*  
430 *Symposium (USENIX Security 20)*, pages 2505–2522, 2020.
- 431 [26] Payman Mohassel and Yupeng Zhang. Secureml: A system for scalable privacy-preserving  
432 machine learning. In *2017 IEEE symposium on security and privacy (SP)*, pages 19–38. IEEE,  
433 2017.
- 434 [27] Ran Ran, Wei Wang, Quan Gang, Jieming Yin, Nuo Xu, and Wujie Wen. CryptoGCN: Fast  
435 and scalable homomorphically encrypted graph convolutional network inference. In Alice H.  
436 Oh, Alekh Agarwal, Danielle Belgrave, and Kyunghyun Cho, editors, *Advances in Neural*  
437 *Information Processing Systems*, 2022.
- 438 [28] Ronald L Rivest, Len Adleman, Michael L Dertouzos, et al. On data banks and privacy  
439 homomorphisms. *Foundations of secure computation*, 4(11):169–180, 1978.
- 440 [29] Bitar Darvish Rouhani, M Sadegh Riazi, and Farinaz Koushanfar. Deepsecure: Scalable provably-  
441 secure deep learning. In *Proceedings of the 55th annual design automation conference*, pages  
442 1–6, 2018.
- 443 [30] Microsoft SEAL (release 3.7). <https://github.com/Microsoft/SEAL>, September 2021.  
444 Microsoft Research, Redmond, WA.
- 445 [31] Prithviraj Sen, Galileo Namata, Mustafa Bilgic, Lise Getoor, Brian Galligher, and Tina Eliassi-  
446 Rad. Collective classification in network data. *AI magazine*, 29(3):93–93, 2008.
- 447 [32] Minjie Wang, Da Zheng, Zihao Ye, Quan Gan, Mufei Li, Xiang Song, Jinjing Zhou, Chao Ma,  
448 Lingfan Yu, Yu Gai, Tianjun Xiao, Tong He, George Karypis, Jinyang Li, and Zheng Zhang.  
449 Deep graph library: A graph-centric, highly-performant package for graph neural networks.  
450 *preprint arXiv:1909.01315*, 2019.
- 451 [33] Le Wu, Peijie Sun, Richang Hong, Yanjie Fu, Xiting Wang, and Meng Wang. Socialgcn: An  
452 efficient graph convolutional network based model for social recommendation. *arXiv preprint*  
453 *arXiv:1811.02815*, 2018.
- 454 [34] Shiwen Wu, Fei Sun, Wentao Zhang, Xu Xie, and Bin Cui. Graph neural networks in recom-  
455 mender systems: a survey. *ACM Computing Surveys (CSUR)*, 2020.
- 456 [35] Andrew Chi-Chih Yao. How to generate and exchange secrets. In *27th Annual Symposium on*  
457 *Foundations of Computer Science (sfcs 1986)*, pages 162–167. IEEE, 1986.
